# Supplementary material for: Hepatic PTP4A1 ameliorates high-fat diet-induced hepatosteatosis and hyperglycemia by the activation of the CREBH/FGF21 axis
Source: PubMed Central journal article supplement (PMC9925322; doi:10.7150/thno.79434), 2023-01-22
Supplement: thnov13p1076s1.pdf [file thnov13p1076s1.pdf]

1 **Hepatic PTP4A1 ameliorates high-fat diet-induced hepatosteatosis and hyperglycemia by the**  
2 **activation of the CREBH/FGF21 axis**

3

4 Byungtae Hwang<sup>1,#</sup>, Min-Gi Kwon<sup>1,4,#</sup>, Min Ji Cho<sup>1</sup>, Nam-Kyung Lee<sup>1</sup>, Jangwook Lee<sup>1</sup>, Jeong Woong  
5 Lee<sup>1</sup>, Kyoung-Jin Oh<sup>2</sup>, Kwang-Hee Bae<sup>2</sup>, Jung Hwan Hwang<sup>3</sup>, Jeong-Ki Min<sup>1,4,\*</sup>, Jong-Gil Park<sup>1,4,\*</sup>

6

7 <sup>1</sup>Biotherapeutics Translational Research Center, Korea Research Institute of Bioscience &  
8 Biotechnology (KRIBB), 125 Gwahak-ro, Yuseong-gu, Daejeon 34141, Republic of Korea.

9 <sup>2</sup>Metabolic Regulation Research Center, Korea Research Institute of Bioscience & Biotechnology  
10 (KRIBB), 125 Gwahak-ro, Yuseong-gu, Daejeon 34141, Republic of Korea.

11 <sup>3</sup>Laboratory Animal Resource Center, Korea Research Institute of Bioscience & Biotechnology  
12 (KRIBB), 125 Gwahak-ro, Yuseong-gu, Daejeon 34141, Republic of Korea.

13 <sup>4</sup>Department of Bioscience, KRIBB School of Bioscience, Korea University of Science and  
14 Technology (UST), 125 Gwahak-ro, Yuseong-gu, Daejeon 34141, Republic of Korea.

15

16 # These authors contributed equally to this work

17 \*Correspondence to Jeong-Ki Min, PhD., Biotherapeutics Translational Research Center, Korea  
18 Research Institute of Bioscience & Biotechnology, 125 Gwahak-ro, Yuseong-gu, Daejeon 34141,  
19 Republic of Korea; Tel: +82-42-860-4137; Fax: +82-42-860-4149; E-mail: jekmin74@gmail.com

20 \*Correspondence to Jong-Gil Park, PhD., Biotherapeutics Translational Research Center, Korea  
21 Research Institute of Bioscience & Biotechnology, 125 Gwahak-ro, Yuseong-gu, Daejeon 34141,  
22 Republic of Korea; Tel: +82-42-860-4122; Fax: +82-42-860-4149; E-mail: jonggilpark@kribb.re.kr

| Primer name (mouse) | Primer sequence |                          |
|---------------------|-----------------|--------------------------|
| <i>Ptp4a1</i>       | Forward         | CAACTTACGACACTACTCTT     |
|                     | Reverse         | CAGCAACCAGGTTCTTCACG     |
| <i>Ptp4a2</i>       | Forward         | TGCTACATATGATAAAGCTCC    |
|                     | Reverse         | CTACTGAACACAGCAGTGCC     |
| <i>Ptp4a3</i>       | Forward         | CCTATGACAAGACCCCCCTG     |
|                     | Reverse         | CTACATGACGCAGCATCTGG     |
| <i>F4/80</i>        | Forward         | CTTTGGCTATGGGCTTCCAGTC   |
|                     | Reverse         | GCAAGGAGGACAGAGTTTATCGTG |
| <i>Mcp1</i>         | Forward         | AGGTCCCTGTCATGCTTCTG     |
|                     | Reverse         | GCTGCTGGTGATCCTCTTGT     |
| <i>Mip1a</i>        | Forward         | TTCTCTGTACCATGACACTCTGC  |
|                     | Reverse         | CGTGGAATCTTCCGGCTGTAG    |
| <i>CD11c</i>        | Forward         | ACACAGTGTGCTCCAGTATGA    |
|                     | Reverse         | GCCCAGGGATATGTTACAGC     |
| <i>KC</i>           | Forward         | ACTGCACCCAAACCGAAGTC     |
|                     | Reverse         | TGGGGACACCTTTTAGCATCTT   |
| <i>Foxo1</i>        | Forward         | TGGTGAACACCATGCCTCAC     |
|                     | Reverse         | CTTCTCCTGGTGGAGGACAC     |
| <i>Pck1</i>         | Forward         | CTGCATAACGGTCTGGACTTC    |
|                     | Reverse         | CAGCAACTGCCCGTACTCC      |
| <i>G6pc</i>         | Forward         | CGACTCGCTATCTCCAAGTGA    |
|                     | Reverse         | GTTGAACCAGTCTCCGACCA     |
| <i>Fgf21</i>        | Forward         | GGAGCTCTCTATGGATCGCCT    |
|                     | Reverse         | TGTAACCGTCCTCCAGCAGC     |
| <i>Srebf1</i>       | Forward         | CAGCTCAGAGCCGTGGTGA      |
|                     | Reverse         | TTGATAGAAGACCGGTAGCGC    |
| <i>Srebf2</i>       | Forward         | GTGGAGCAGTCTCAACGTC      |
|                     | Reverse         | CCGGATGCATGGTAGGTCTC     |
| <i>ChREBP</i>       | Forward         | CCAGCCTCAAGGTGAGCAAA     |
|                     | Reverse         | CATGTCCCGCATCTGGTCA      |
| <i>Fasn</i>         | Forward         | GGAGGTGGTGATAGCCGGTAT    |
|                     | Reverse         | TGGGTAATCCATAGAGCCCAG    |
| <i>Scd1</i>         | Forward         | TTCTTGCGATACTCTGGTGC     |
|                     | Reverse         | CGGGATTGAATGTTCTTGTCGT   |
| <i>Elov5</i>        | Forward         | ATGGAACATTTTCGATGCGTCA   |
|                     | Reverse         | GTCCCAGCCATACAATGAGTAAG  |
| <i>Dgat2</i>        | Forward         | GAAGCTGCCCGCAGCGAAAA     |
|                     | Reverse         | TCTTGGGCGTGTTCCAGTCAA    |

|                     |                 |                         |
|---------------------|-----------------|-------------------------|
| <i>Ppara</i>        | Forward         | CTGCAGAGCAACCATCCAGA    |
|                     | Reverse         | TGATGACCTGTACGAGCTGC    |
| <i>Acox1</i>        | Forward         | TCAACAGCCCAACTGTGACT    |
|                     | Reverse         | GGCCGATATCCCCAACAGTG    |
| <i>Cpt1a</i>        | Forward         | CTCCGCCTGAGCCATGAAG     |
|                     | Reverse         | CACCAGTGATGATGCCATTCT   |
| <i>Cpt2</i>         | Forward         | CAGCACAGCATCGTACCCA     |
|                     | Reverse         | TCCCAATGCCGTTCTCAAAAT   |
| <i>Hadh</i>         | Forward         | TCAAGCATGTGACCGTCATCG   |
|                     | Reverse         | TGGATTTTGCCAGGATGTCTTC  |
| <i>Ehhadh</i>       | Forward         | ATGGCTGAGTATCTGAGGCTG   |
|                     | Reverse         | GGTCCAAACTAGCTTTCTGGAG  |
| <i>Acadv1</i>       | Forward         | CTACTGTGCTTCAGGGACAAC   |
|                     | Reverse         | CAAAGGACTTCGATTCTGCCC   |
| <i>Acadl</i>        | Forward         | TCTTTTCCTCGGAGCATGACA   |
|                     | Reverse         | GACCTCTCTACTCACTTCTCCAG |
| <i>Acadm</i>        | Forward         | AGGGTTTAGTTTTGAGTTGACGG |
|                     | Reverse         | CCCCGCTTTTGT CATATCCG   |
| <i>18s</i>          | Forward         | CGCCGCTAGAGGTGAAATTC    |
|                     | Reverse         | TTGGCAAATGCTTTTCGCT     |
| Primer name (human) | Primer sequence |                         |
| <i>PTP4A1</i>       | Forward         | GTGAAGCAACTTATGACACT    |
|                     | Reverse         | CAGAAGTTGCTTGCTGTTAA    |
| <i>PTP4A2</i>       | Forward         | AGCTCCACCCCCTAATCAGA    |
|                     | Reverse         | TTGAACGCTCCCCTTCTTTT    |
| <i>PTP4A3</i>       | Forward         | CGGCAAGGTAGTGGAAGAC     |
|                     | Reverse         | GGCGGATGAACTGGATGG      |
| <i>FGF21</i>        | Forward         | ATGGATCGCTCCACTTTGACC   |
|                     | Reverse         | GGGCTTCGGACTGGTAAACAT   |
| <i>GAPDH</i>        | Forward         | CGCCACAGTTTCCCGGAGGG    |
|                     | Reverse         | CCCTCCAAAATCAAGTGGGG    |

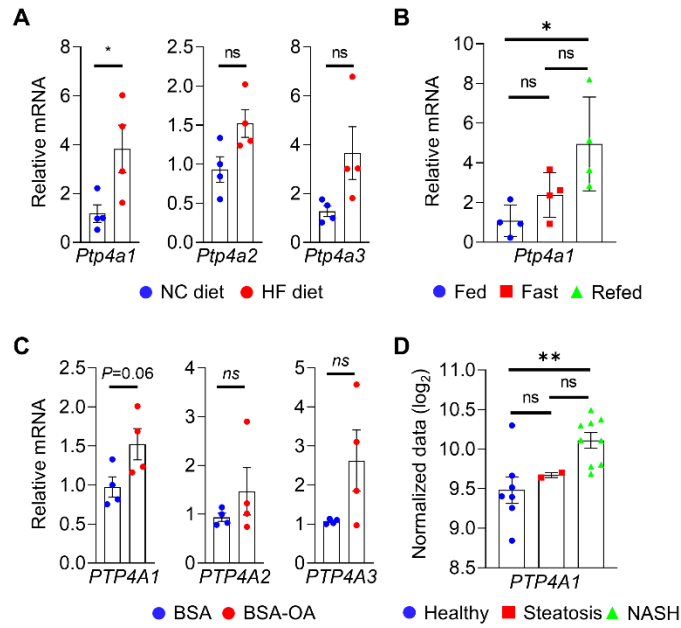

27

28 **Figure S1. Lacking PTP4A1 in mice exacerbates a high-fat (HF) diet-induced hyperglycemia**  
 29 **and NAFLD, related to Figure 1.**

30 **(A)** The mRNA levels of the *Ptp4a1*, *Ptp4a2*, and *Ptp4a3* in the livers of WT mice fed an HF diet or a  
 31 normal chow (NC) diet (n = 4). **(B)** The mRNA levels of the *Ptp4a1* in the livers of WT mice on an  
 32 NC diet in feeding and fasting conditions (n = 4). **(C)** The mRNA levels of the *PTP4A1*, *PTP4A2*, and  
 33 *PTP4A3* in Hep3B treated with bovine serum albumin (BSA) or BSA-oleic acid (BSA-OA) (n = 4).  
 34 **(D)** The levels of PTP4A1 gene expression in human liver samples of healthy control, steatosis, and  
 35 non-alcoholic steatohepatitis (NASH) from the dataset GSE63067. Data are presented as the mean ±  
 36 standard error of the mean. \* $P < 0.05$ , \*\* $P < 0.01$ , n.s., not significant (two-tailed Student's t-test for  
 37 A and C; one-way ANOVA for B and D).

38

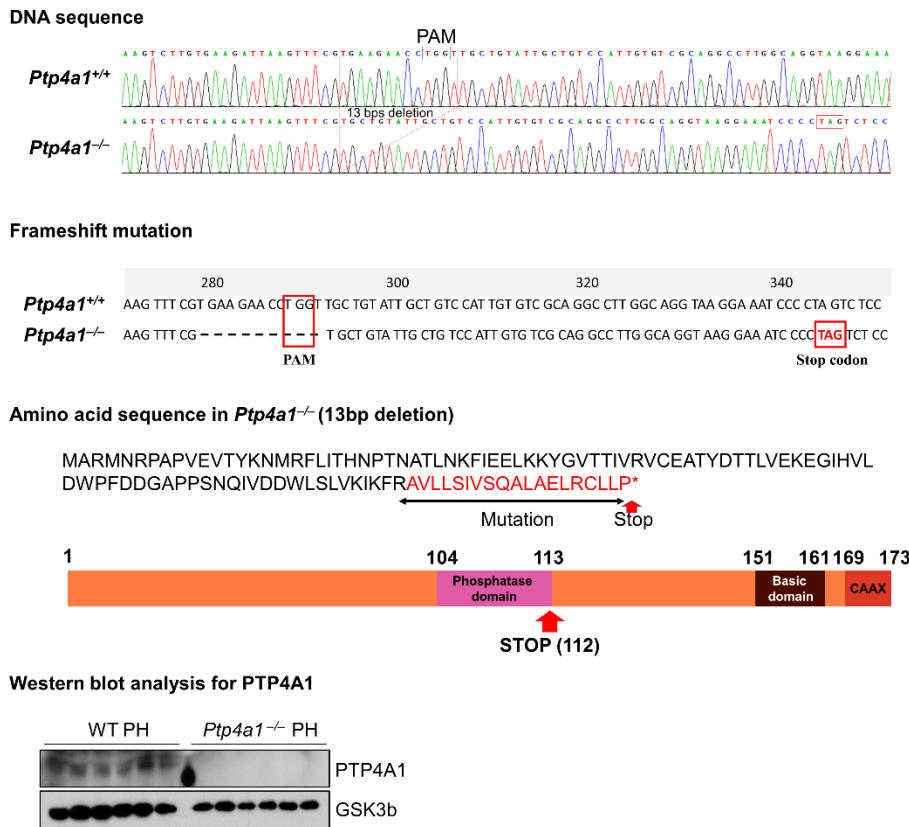

39

40 **Figure S2. Lacking PTP4A1 in mice exacerbates a high-fat (HF) diet-induced hyperglycemia**  
 41 **and NAFLD, related to Figure 1.**

42 Generation of *Ptp4a1*<sup>-/-</sup> mice using the CRISPR/Cas9 system. Genomic DNA sequences, frameshift  
 43 mutation-induced first stop codon, predicted premature amino acid sequences, and western blot analysis  
 44 for PTP4A1 in the lysates of primary hepatocytes from *Ptp4a1*<sup>+/+</sup> and *Ptp4a1*<sup>-/-</sup> mice. GSK3β was used  
 45 as a loading control. The protospacer adjacent motif (PAM) sequence (TGG) is indicated in the red box  
 46 on the genomic DNA sequence.

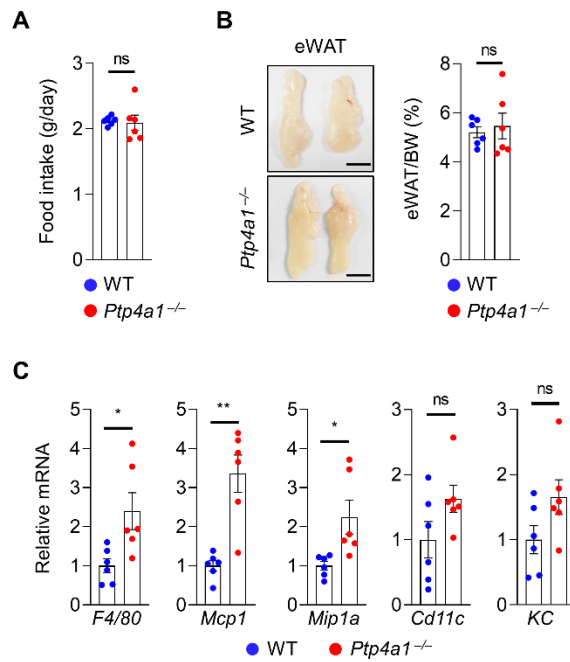

47

48 **Figure S3. Lacking PTP4A1 in mice exacerbates a high-fat (HF) diet-induced hyperglycemia**  
 49 **and NAFLD, related to Figure 1.**

50 **(A)** Food intake of *Ptp4a1*<sup>-/-</sup> mice and wild-type (WT) littermates on an HF diet (n = 6). **(B)** The  
 51 representative images of epididymal white adipose tissue (eWAT) and the ratio of eWAT mass to body  
 52 weight (BW) in WT and *Ptp4a1*<sup>-/-</sup> mice after feeding an HF diet for 12 weeks (n = 6). Scale bar, 1 cm.  
 53 **(C)** The mRNA levels of the *F4/80*, *Mcp1*, *Mip1a*, *Cd11c*, and *KC* in the livers of WT and *Ptp4a1*<sup>-/-</sup>  
 54 mice fed an HF diet for 12 weeks (n = 6). Data are presented as the mean ± standard error of the  
 55 mean. \**P* < 0.05, \*\**P* < 0.01, n.s., not significant (Mann–Whitney U test for A and B; two-tailed  
 56 Student's t-test for C).

57

58

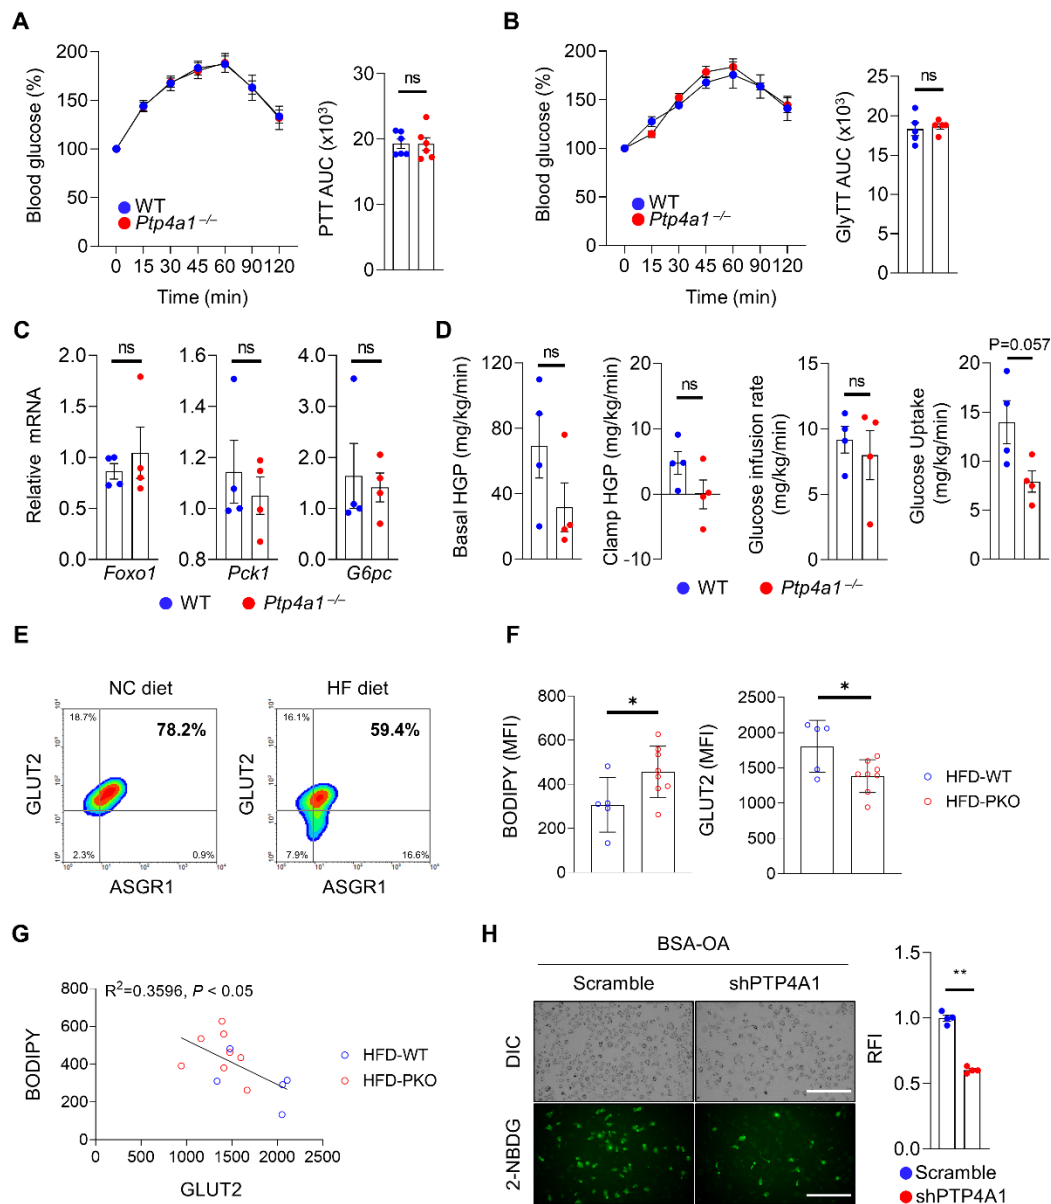

59

60 **Figure S4. The deficiency of PTP4A1 in mice fed a high-fat (HF) diet reduces glucose uptake by**  
 61 **a decrease in GLUT2 on the plasma membrane in hepatocytes, related to Figure 2.**

62 (A) The pyruvate tolerance test (PTT, n = 6) and (B) glycerol tolerance test (GlyTT, n = 5) with the  
 63 area under the curve (AUC) in wild-type (WT) and *Ptp4a1*<sup>-/-</sup> mice after feeding an HF diet. (C) The  
 64 mRNA levels of the *Foxo1*, *Pck1*, and *G6pc* genes in the livers of WT and *Ptp4a1*<sup>-/-</sup> mice fed an HF  
 65 diet for 12 weeks (n = 4). (D) The hyperinsulinemic-euglycemic clamp study for basal hepatic glucose  
 66 production (HGP), clamp HGP, glucose infusion rate, and glucose uptake in WT and *Ptp4a1*<sup>-/-</sup> mice

67 fed an HF diet (n = 54). **(E)** FACS analysis after staining glucose transporter 2 (GLUT2)-APC and  
68 asialoglycoprotein receptor 1 (ASGR1)-Alexa 488 on primary hepatocytes of WT mice fed a normal  
69 chow (NC) or an HF diet. ASGR1 was used as a marker for hepatocytes. Data represent three  
70 independent experiments. **(F)** Mean fluorescence intensity (MFI) for the BODIPY and surface  
71 GLUT2-APC in primary hepatocytes of WT and *Ptp4a1*<sup>-/-</sup> mice fed an HF diet by FACS analysis (n =  
72 5–8). **(G)** Linear regression of BODIPY and GLUT2-APC levels in primary hepatocytes (n = 13). **(H)**  
73 The 2-NBDG uptake assay after incubation of bovine serum albumin-oleic acid (BSA-OA) on Hep3B  
74 treated by PTP4A1-specific shRNA-expressing lentivirus or control lentivirus. Representative images  
75 (left) and quantification for relative fluorescence intensity (RFI, right) (n = 4). Scale bar, 500 μm.  
76 Data are presented as the mean ± standard error of the mean. \*\**P* < 0.01, n.s., not significant (Mann–  
77 Whitney U test for A, B, and D; two-tailed Student’s t-test for C, F, and H; Linear regression for G).



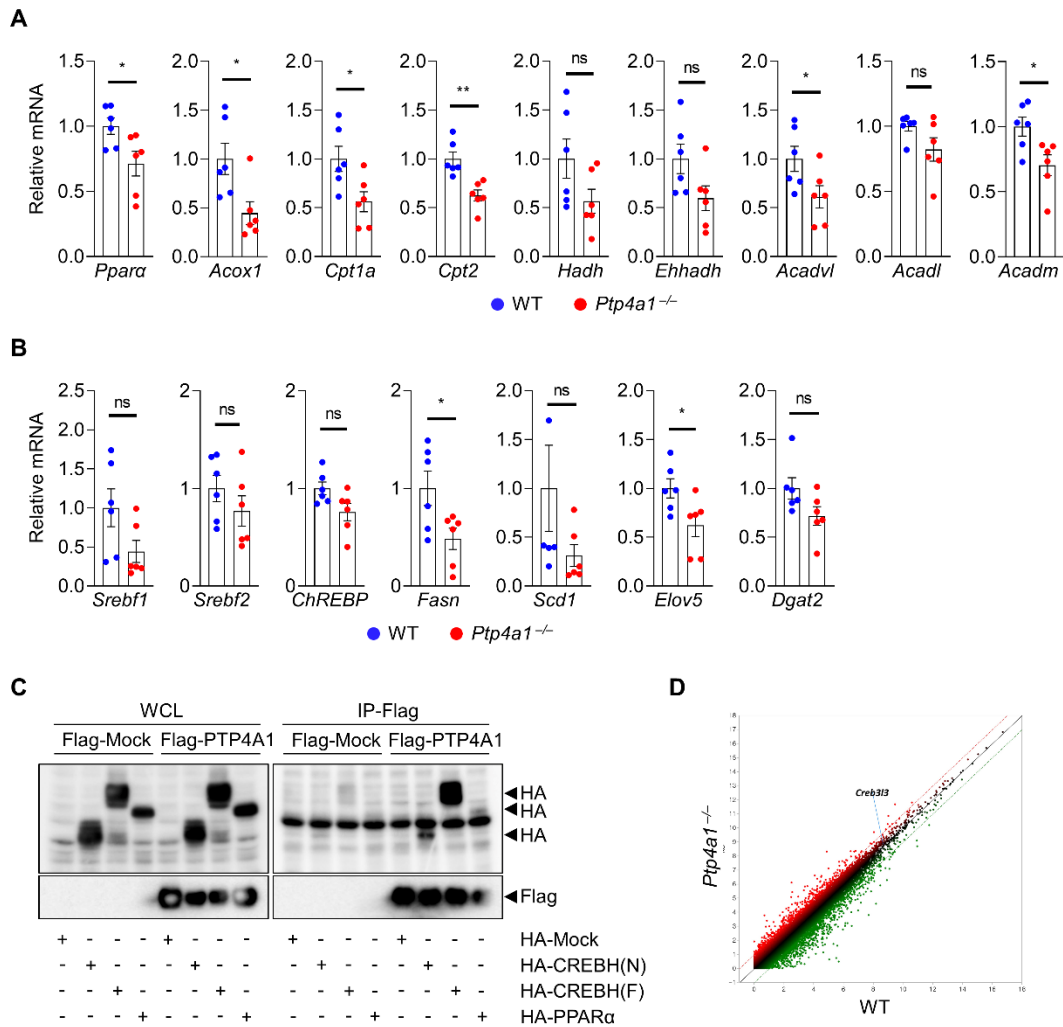

78

79 **Figure S5. PTP4A1 regulates the expression of FGF21 via the up-regulation of CREBH activity,**  
 80 **related to Figure 3.**

81 **(A)** The mRNA levels of *Ppara*, *Acox1*, *Cpt1a*, *Cpt2*, *Hadh*, *Ehhadh*, *Acadvl*, *Acadl*, and *Acadm* genes  
 82 in the livers of wild-type (WT) and *Ptp4a1*<sup>-/-</sup> mice fed an HF diet for 12 weeks (n = 6). **(B)** The  
 83 mRNA levels of *Srebf1*, *Srebf2*, *ChREBP*, *Fasn*, *Scd1*, *Elov5*, and *Dgat2* genes in the livers of WT and  
 84 *Ptp4a1*<sup>-/-</sup> mice fed an HF diet for 12 weeks (n = 6). **(C)** Co-immunoprecipitation assay in HEK 293T  
 85 transfected by HA-Mock, HA-CREBH(N), HA-CREBH(F), or HA-PPAR $\alpha$  with Flag-Mock or Flag-  
 86 PTP4A1. Flag antibody was used for immunoprecipitation. **(D)** The scatter plot indicates the  
 87 expression of the *Creb3l3* gene (encoding CREBH) in the liver of WT and *Ptp4a1*<sup>-/-</sup> mice fed an HF  
 88 diet for 12 weeks. Data represent three independent experiments. Data are presented as the mean  $\pm$

89 standard error of the mean. \* $P < 0.05$ , \*\* $P < 0.01$ , n.s., not significant (two-tailed Student's t-test for  
90 A and B)  
91

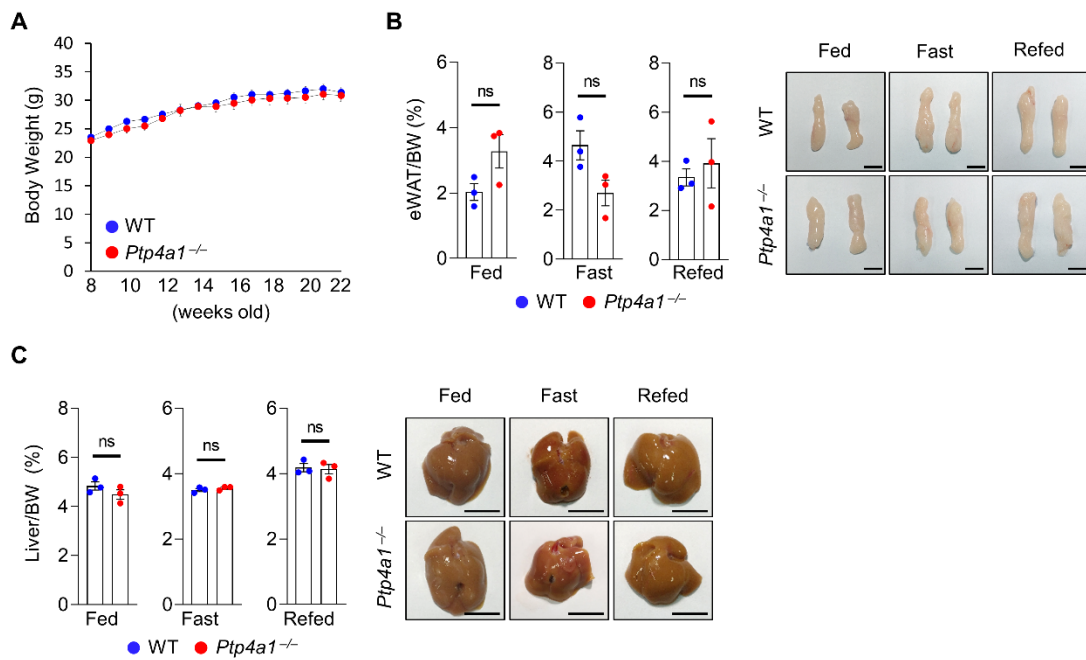

92

93 **Figure S6. Lacking PTP4A1 in mice increases blood glucose and NAFLD by the down-**  
 94 **regulation of FGF21 expression in fasting conditions, related to Figure 4.**

95 **(A)** Body weight (BW) gain of *Ptp4a1*<sup>-/-</sup> mice and wild-type (WT) littermates on a normal chow (NC)  
 96 diet from 8-week-old to 22-week-old (n = 9). **(B)** The ratio of epididymal white adipose tissue  
 97 (eWAT) mass to BW and the representative images of eWAT in WT and *Ptp4a1*<sup>-/-</sup> mice after feeding  
 98 an NC diet at 22-week-old (n = 3). Scale bar, 1 cm. **(C)** The ratio of liver mass to BW and the  
 99 representative images of the liver in WT and *Ptp4a1*<sup>-/-</sup> mice after feeding an NC diet at 22-week-old  
 100 (n = 3). Scale bar, 1 cm. Data are presented as the mean ± standard error of the mean. n.s., not  
 101 significant (Mann–Whitney U test for B and C).

102

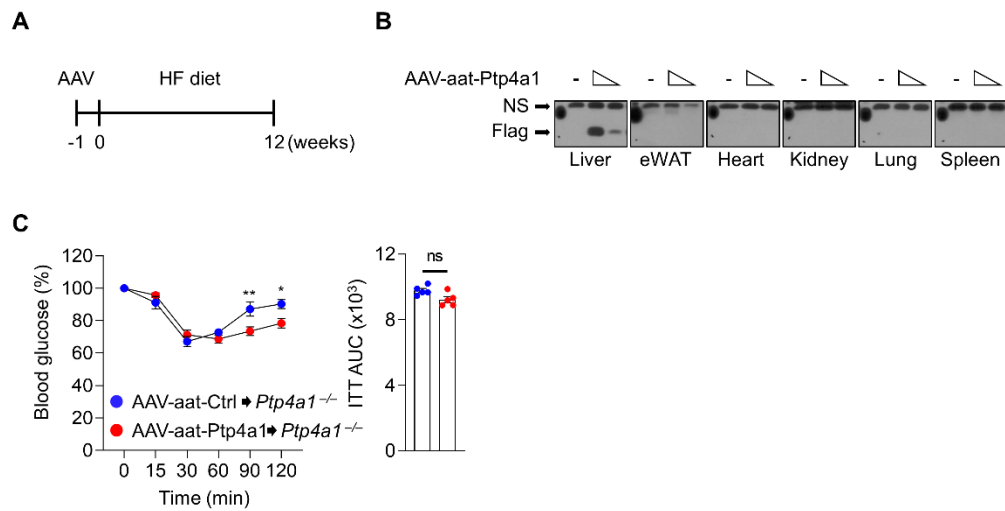

103

104 **Figure S7. Liver-specific PTP4A1 overexpression ameliorates hyperglycemia and NAFLD in**  
 105 ***Ptp4a1*<sup>-/-</sup> mice fed a high-fat (HF) diet, related to Figure 5.**

106 **(A)** The experimental design for administering adeno-associated virus (AAV) and HF diet feeding of  
 107 *Ptp4a1*<sup>-/-</sup> mice. **(B)** Immunoblot analysis of the lysates from the liver, epididymal white adipose tissue  
 108 (eWAT), heart, kidney, lung, and spleen in *Ptp4a1*<sup>-/-</sup> mice injected by AAV-aat-control (Ctrl) or AAV-  
 109 aat-*Ptp4a1*. NS: the non-specific band. **(C)** Insulin tolerance test (ITT) and the area under the curve  
 110 (AUC) of ITT in *Ptp4a1*<sup>-/-</sup> mice administrated with AAV-aat-Ctrl or AAV-aat-*Ptp4a1* after feeding an  
 111 HF diet (n = 5). Data are presented as the mean ± standard error of the mean. \**P* < 0.05, \*\**P* < 0.01,  
 112 n.s., not significant (two-way ANOVA for C (left); Mann–Whitney U test for C (right)).

113

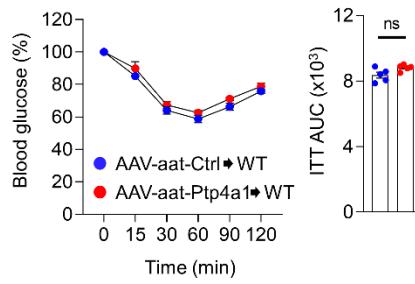

114

115 **Figure S8. Liver-specific PTP4A1 overexpression reduces hyperglycemia and NAFLD after**  
 116 **feeding a high-fat (HF) diet in wild-type (WT) mice, related to Figure 7.**

117 Insulin tolerance test (ITT) and the area under the curve (AUC) of ITT in WT mice administrated with  
 118 AAV-aat-Ctrl or AAV-aat-*Ptp4a1* after feeding an HF diet (n = 5). Data are presented as the mean ±  
 119 standard error of the mean. n.s., not significant (Mann–Whitney U test for the AUC graph).

120
